# Supplementary material
Source: publisher figshare collection journal article supplement (https://karger.figshare.com/articles/dataset/_/5121820)
Supplement: Supplementary file 1 [file 1]

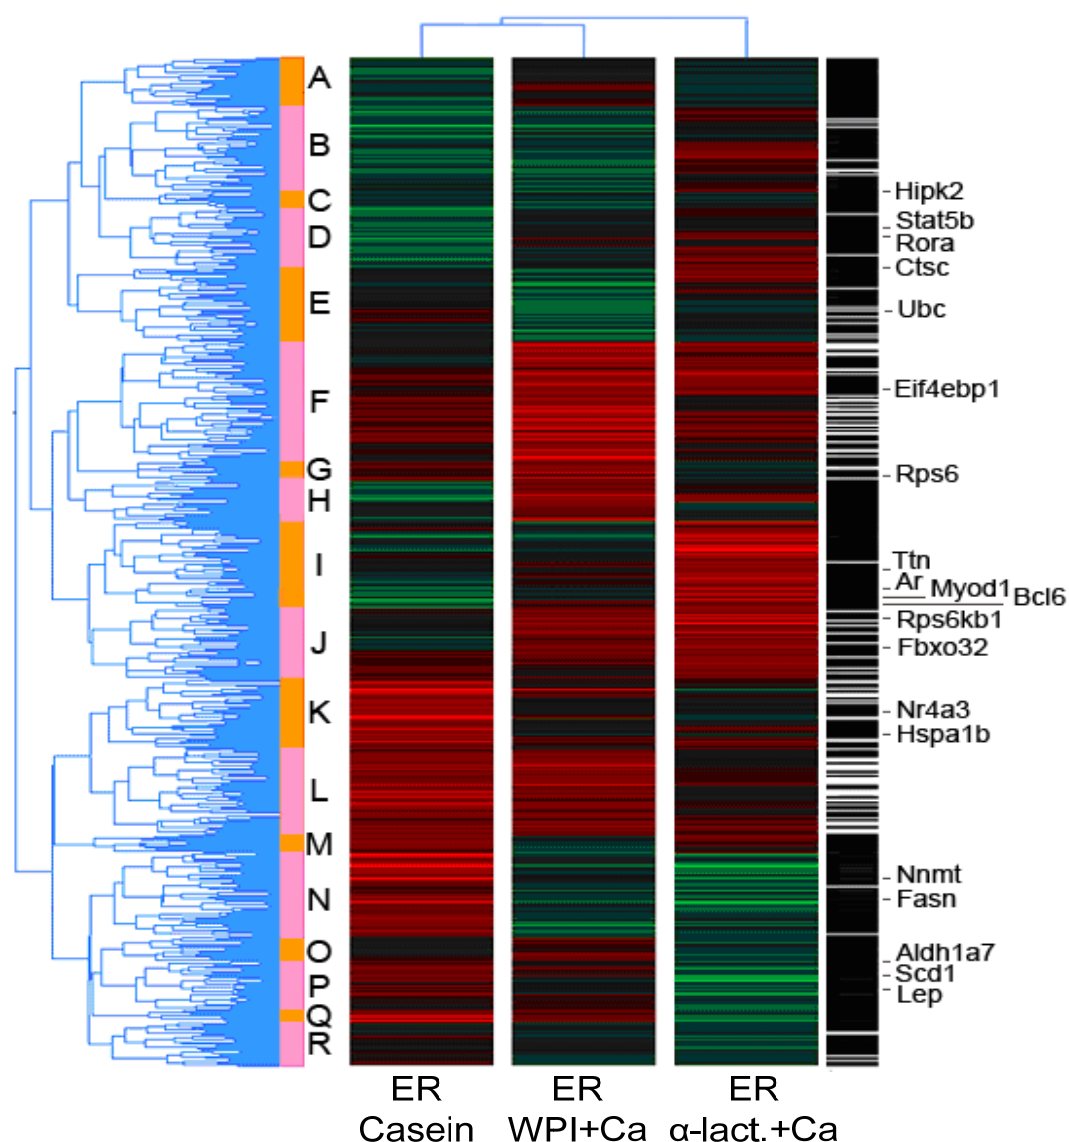

**Figure S1.** The hierarchical clustering of the normalized expression values of over 3 000 genes which are regulated in at least one of the energy restriction (ER) group on casein (left bar), WPI + Ca (middle bar) and  $\alpha$ -lactalbumin + Ca (right bar) diets vs. obese. Red color represents high expression and green color refers to low expression values. The separate clusters are marked with a letter (A-R). For additional information, the genes with also significant changes between lean and obese control groups are marked with a black bar on the right of the diagram, depicting areas which are either altered (black) or unaltered (white) by obesity. The locations of some genes in the clusters are indicated on the right side.
